# Supplementary figures and images for: ACVR2A facilitates trophoblast cell invasion through TCF7/c-JUN pathway in pre-eclampsia progression
Source: eLife journal article supplement (doi:10.7554/elife.101236), 2025-01-06

**ACVR2A**

**NC**

**PE**

**58KDa**

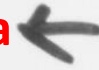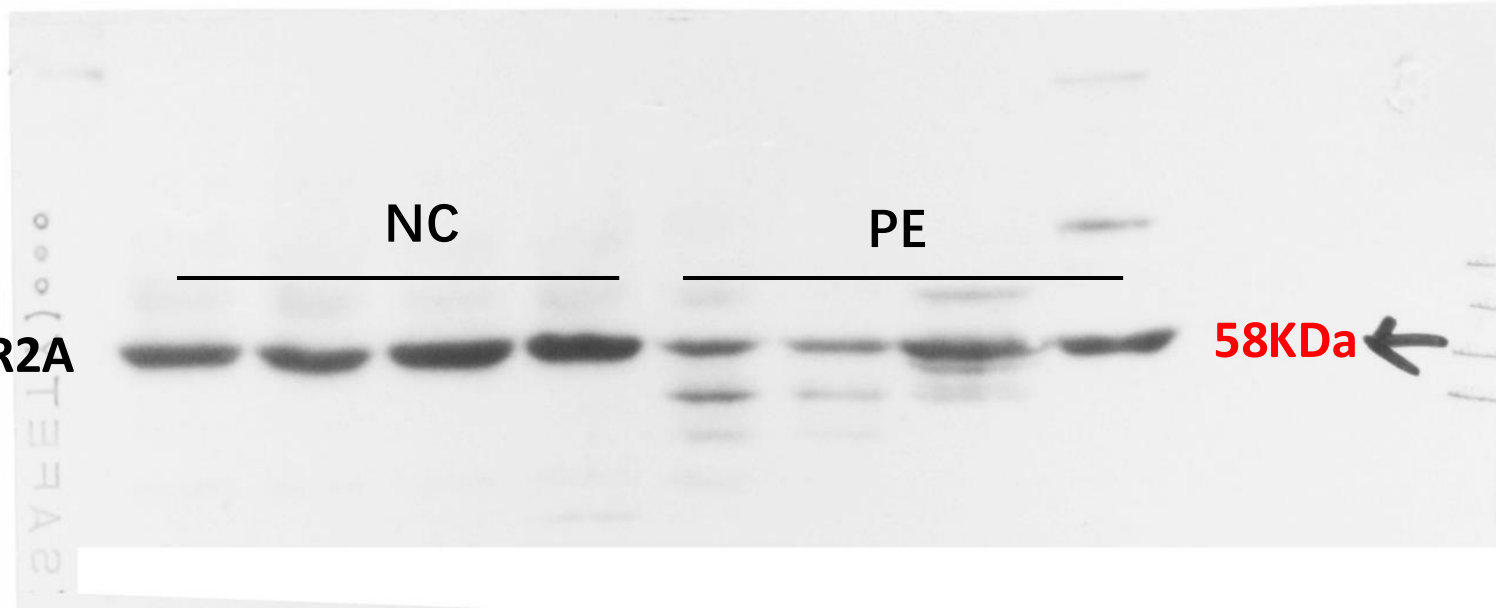

Supplement: fig1-data1 [file elife-101236-fig1-data1-v1.zip]

GAPDH

NC

PE

36KDa

内参 重组

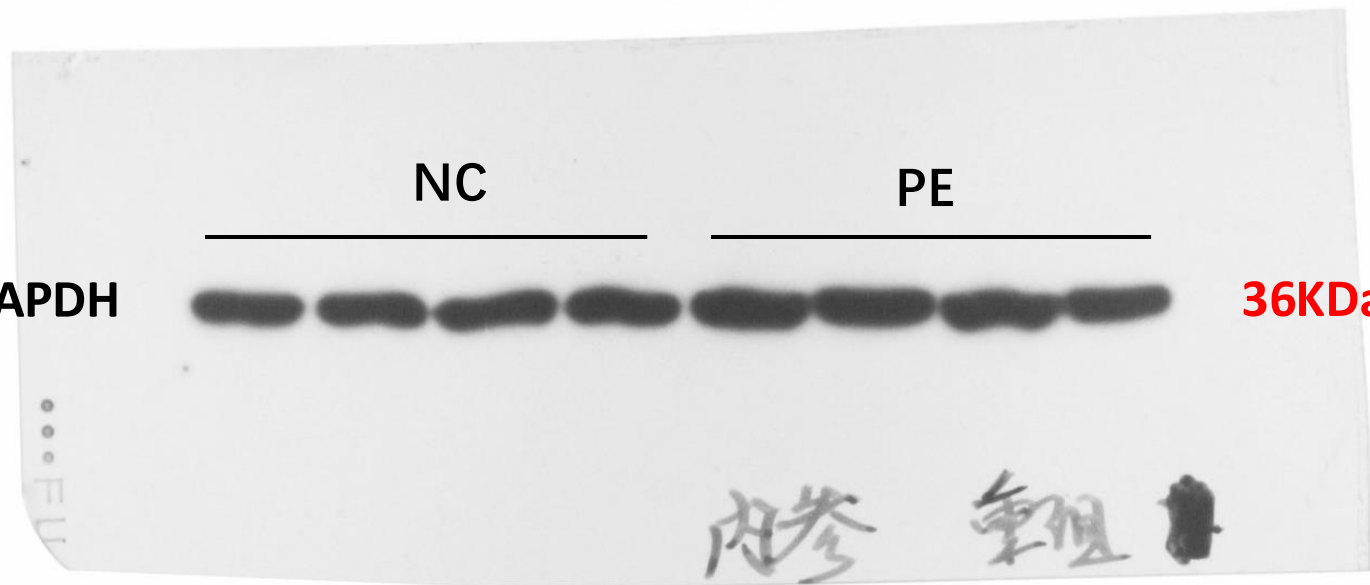

Supplement: fig1-data1 [file elife-101236-fig1-data1-v1.zip]

**GAPDH**

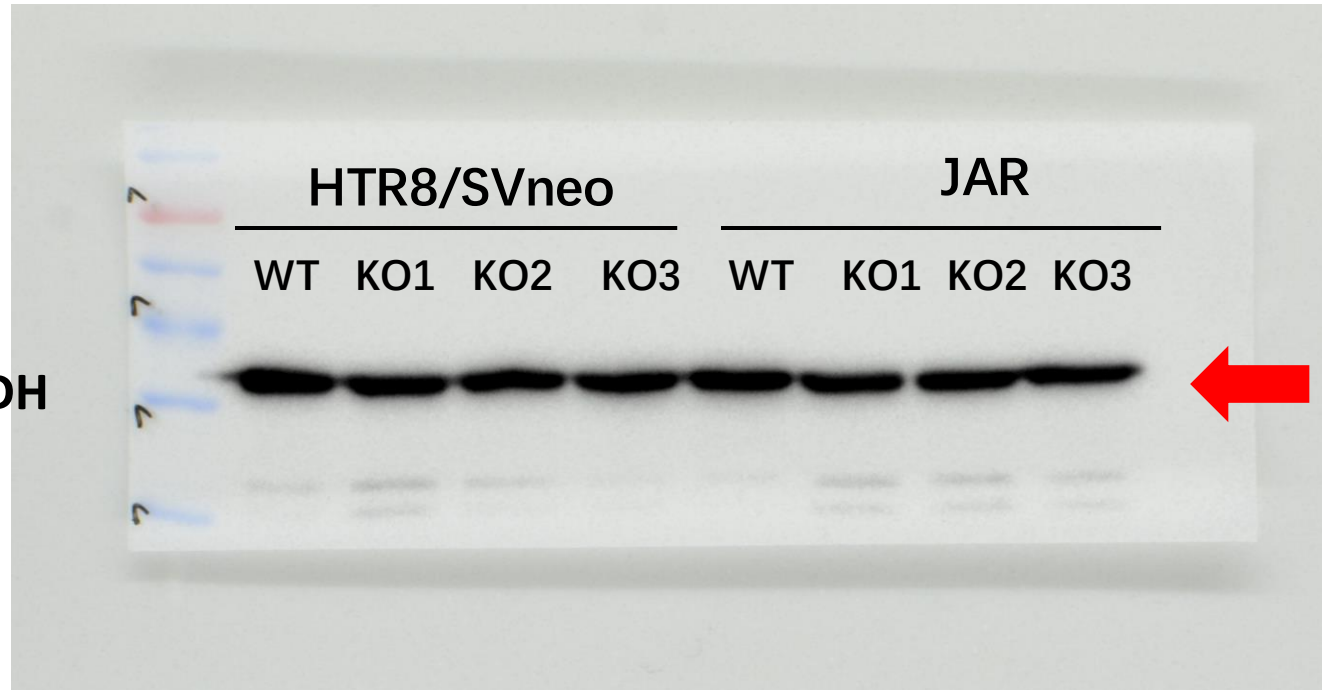

**36KDa**

Supplement: fig2-data1 [file elife-101236-fig2-data1-v1.zip]

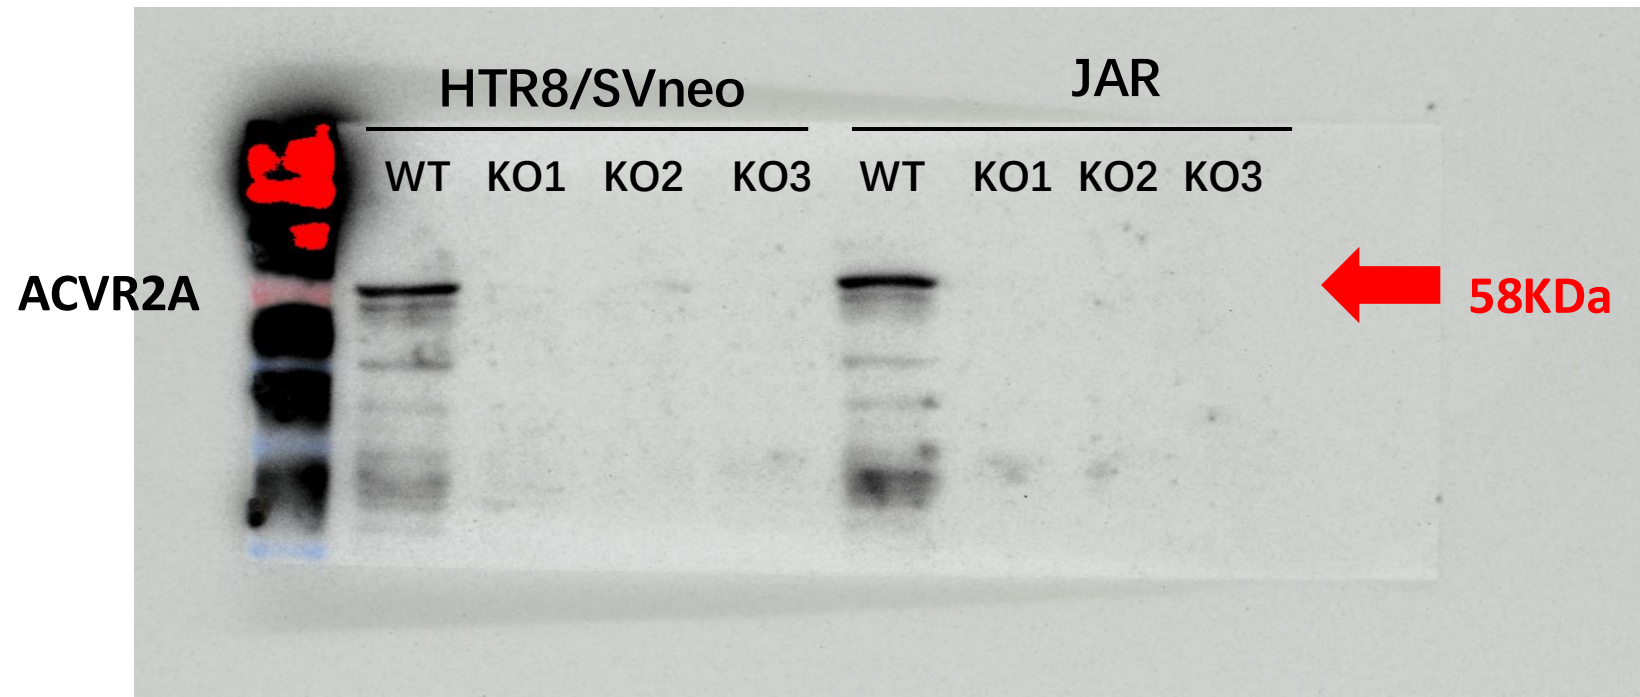

Supplement: fig2-data1 [file elife-101236-fig2-data1-v1.zip]

Figure 2 - Figure supplement 3 source data 1 C

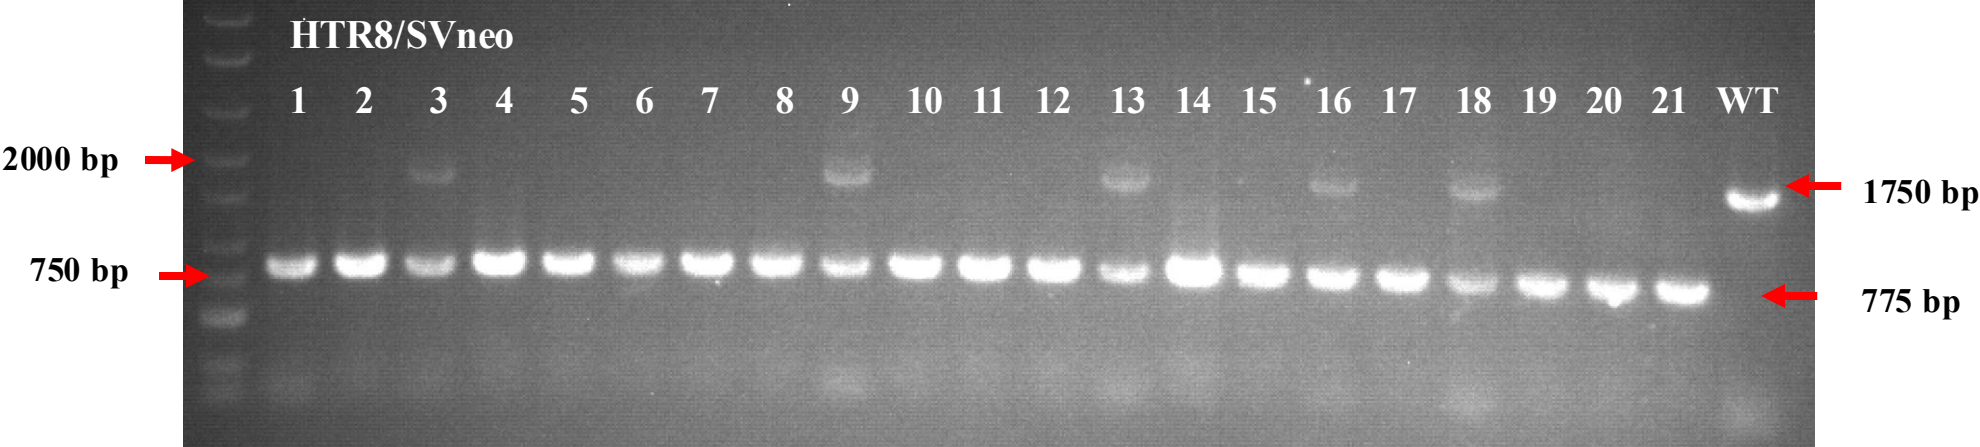

Supplement: fig2-figsupp1-data1 [file elife-101236-fig2-figsupp1-data1-v1.zip]

**Figure 2 - Figure supplement 3 source data 1 E and F**

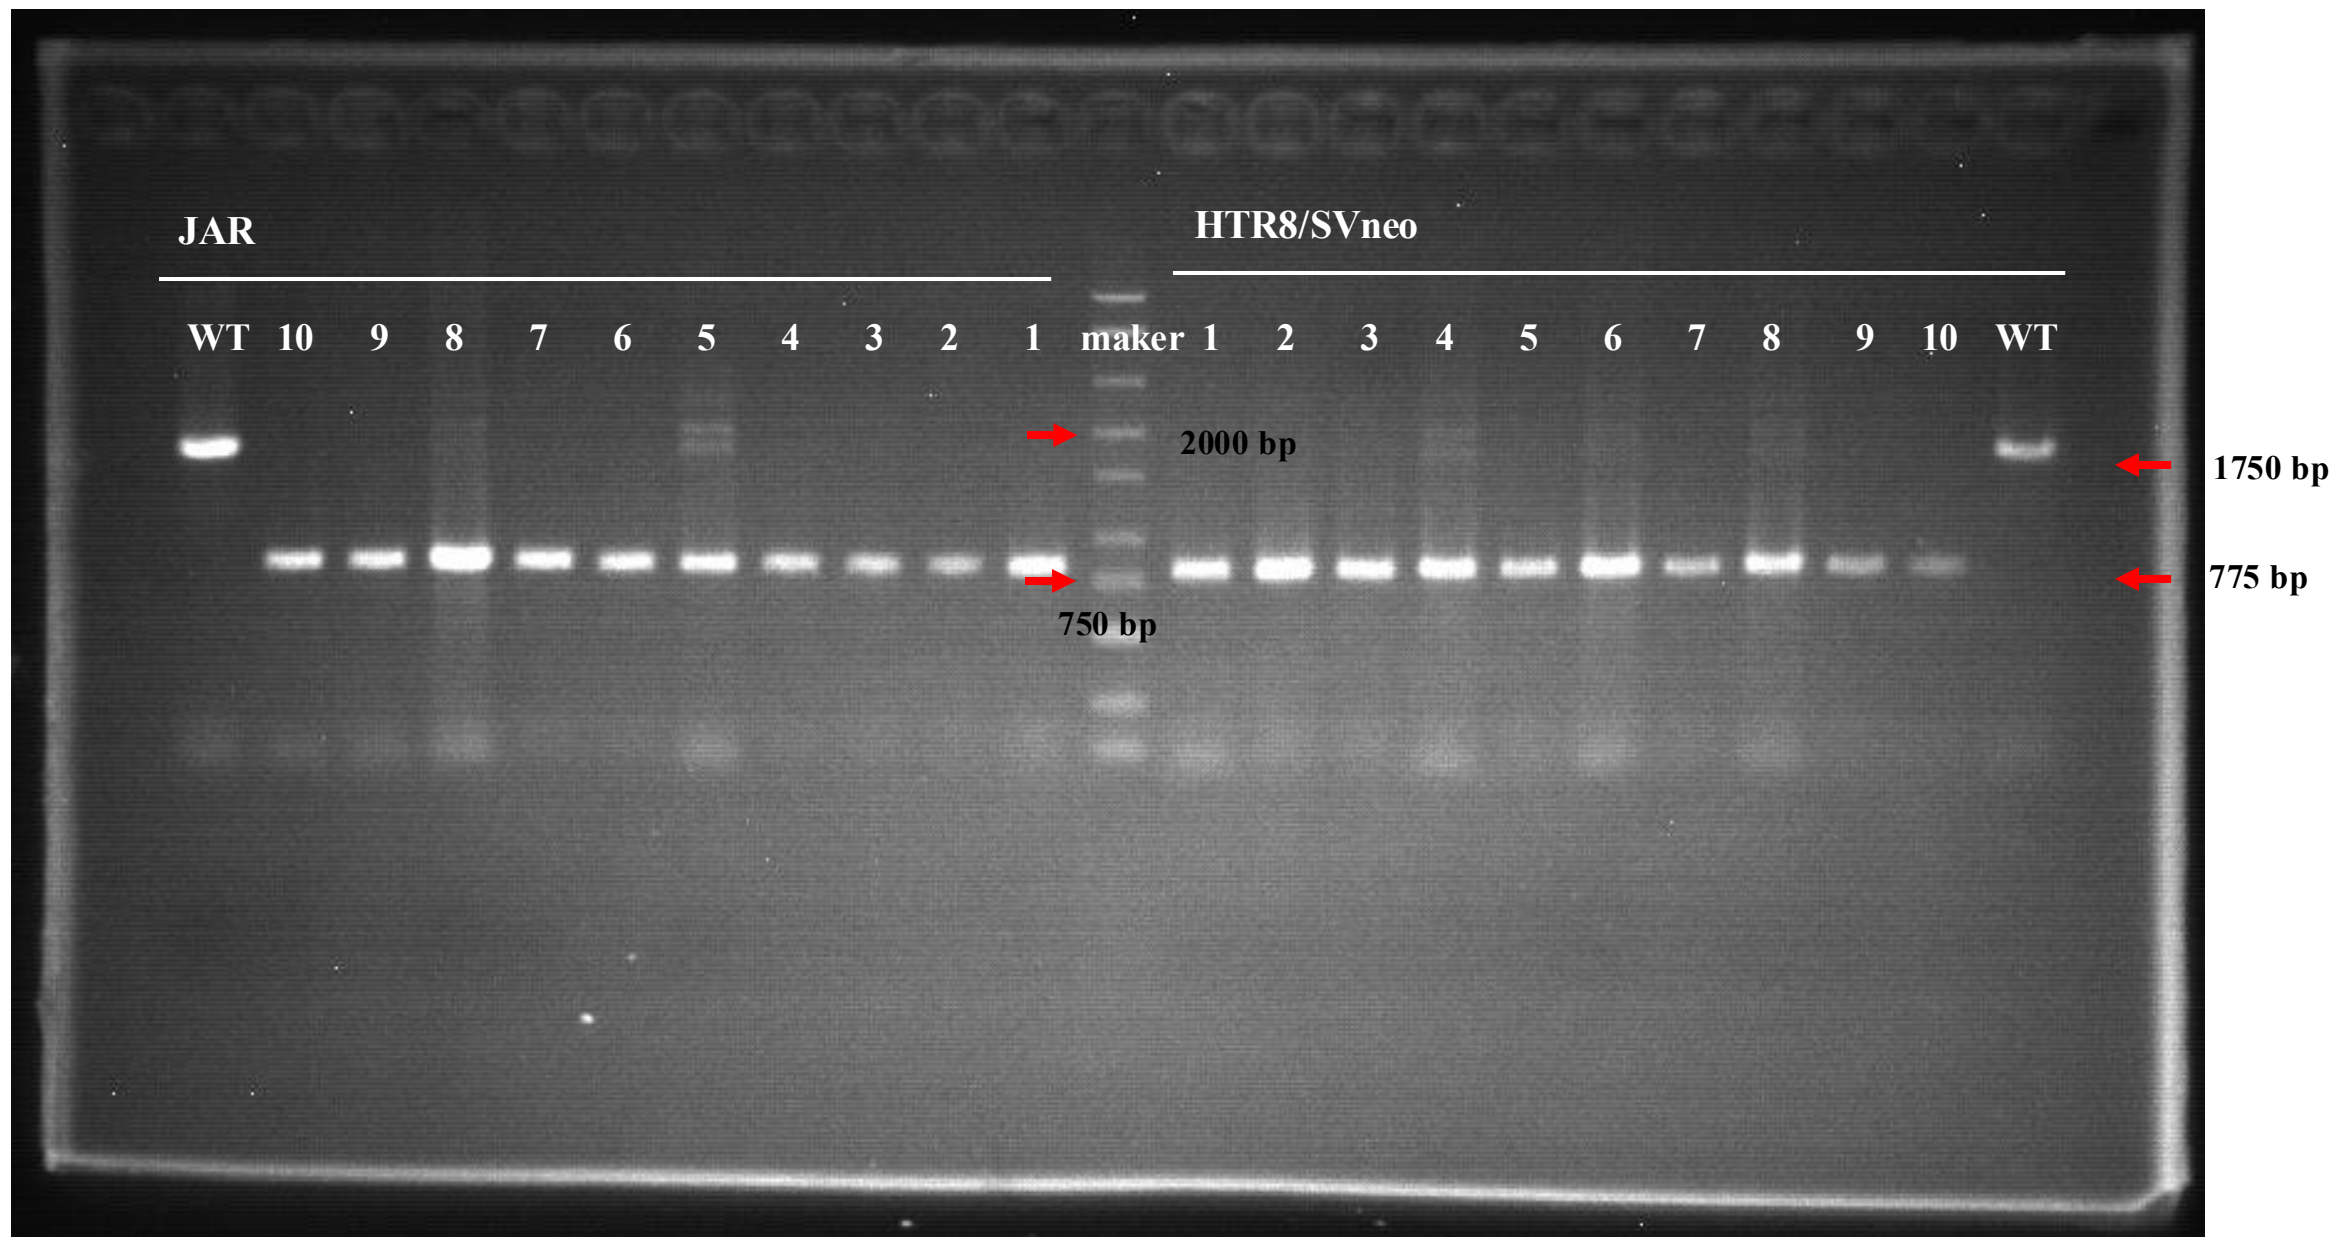

Supplement: fig2-figsupp1-data1 [file elife-101236-fig2-figsupp1-data1-v1.zip]

Figure 2 - Figure supplement 3 source data 1 A

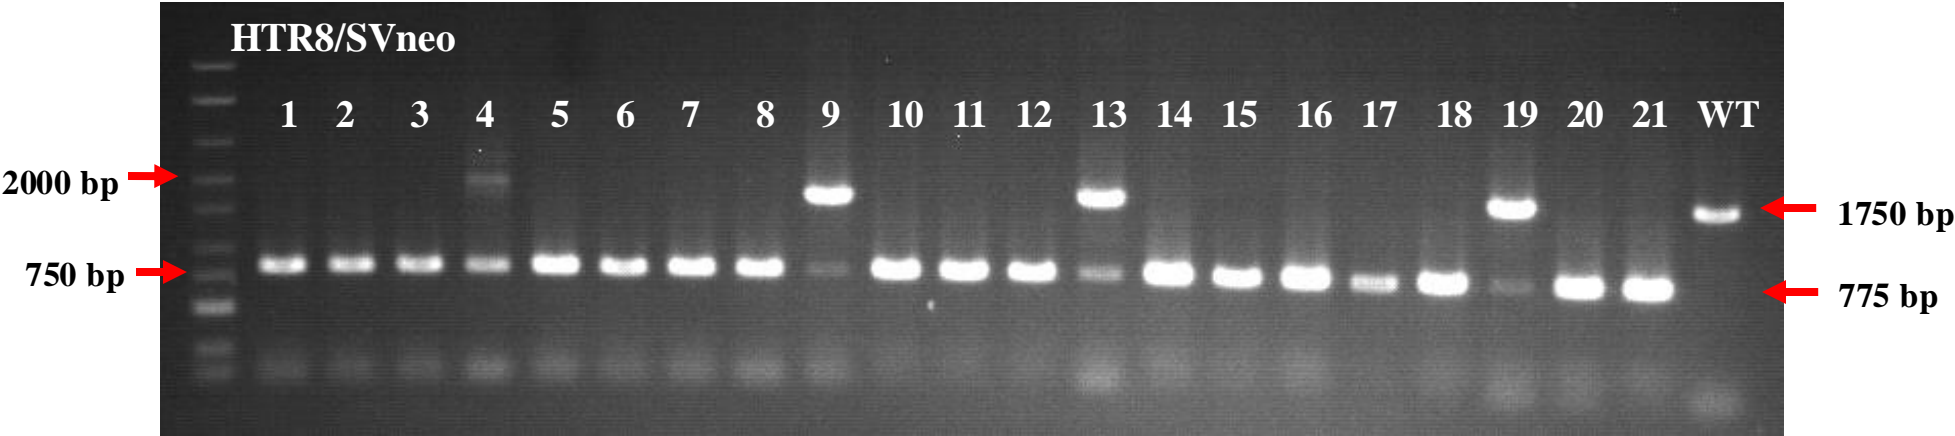

Supplement: fig2-figsupp1-data1 [file elife-101236-fig2-figsupp1-data1-v1.zip]

Figure 2 - Figure supplement 3 source data 1 B

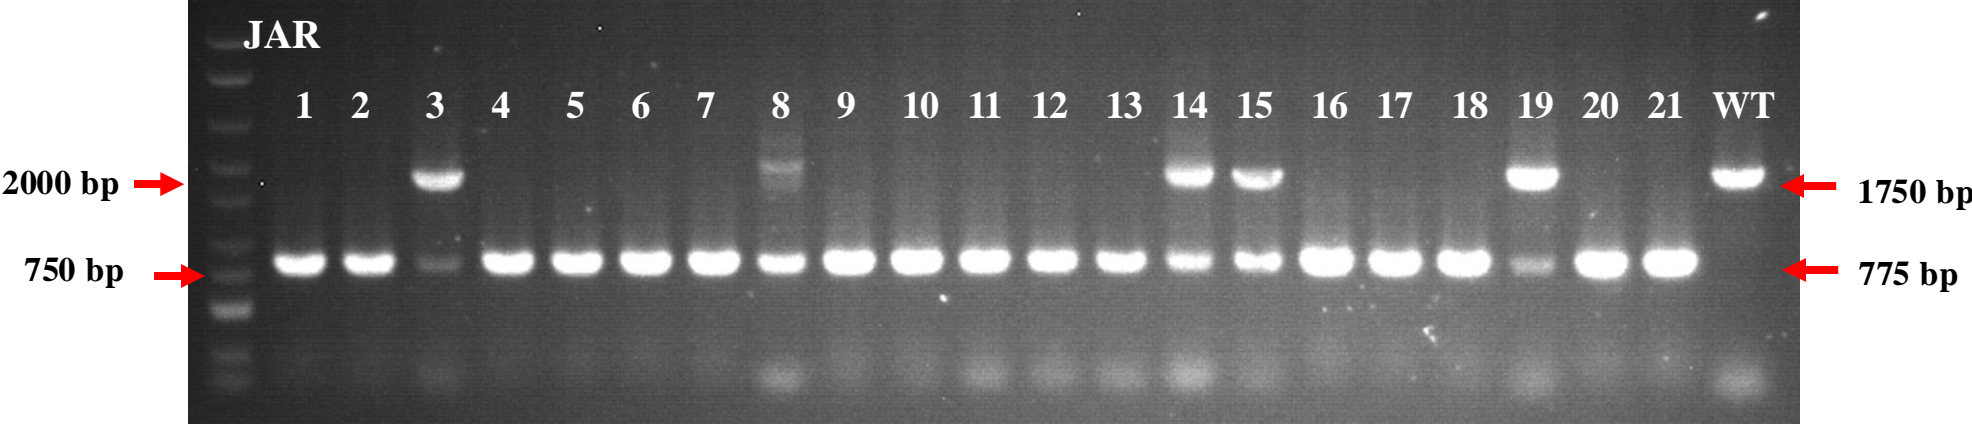

Supplement: fig2-figsupp1-data1 [file elife-101236-fig2-figsupp1-data1-v1.zip]

Figure 2 - Figure supplement 3 source data 1 G and H

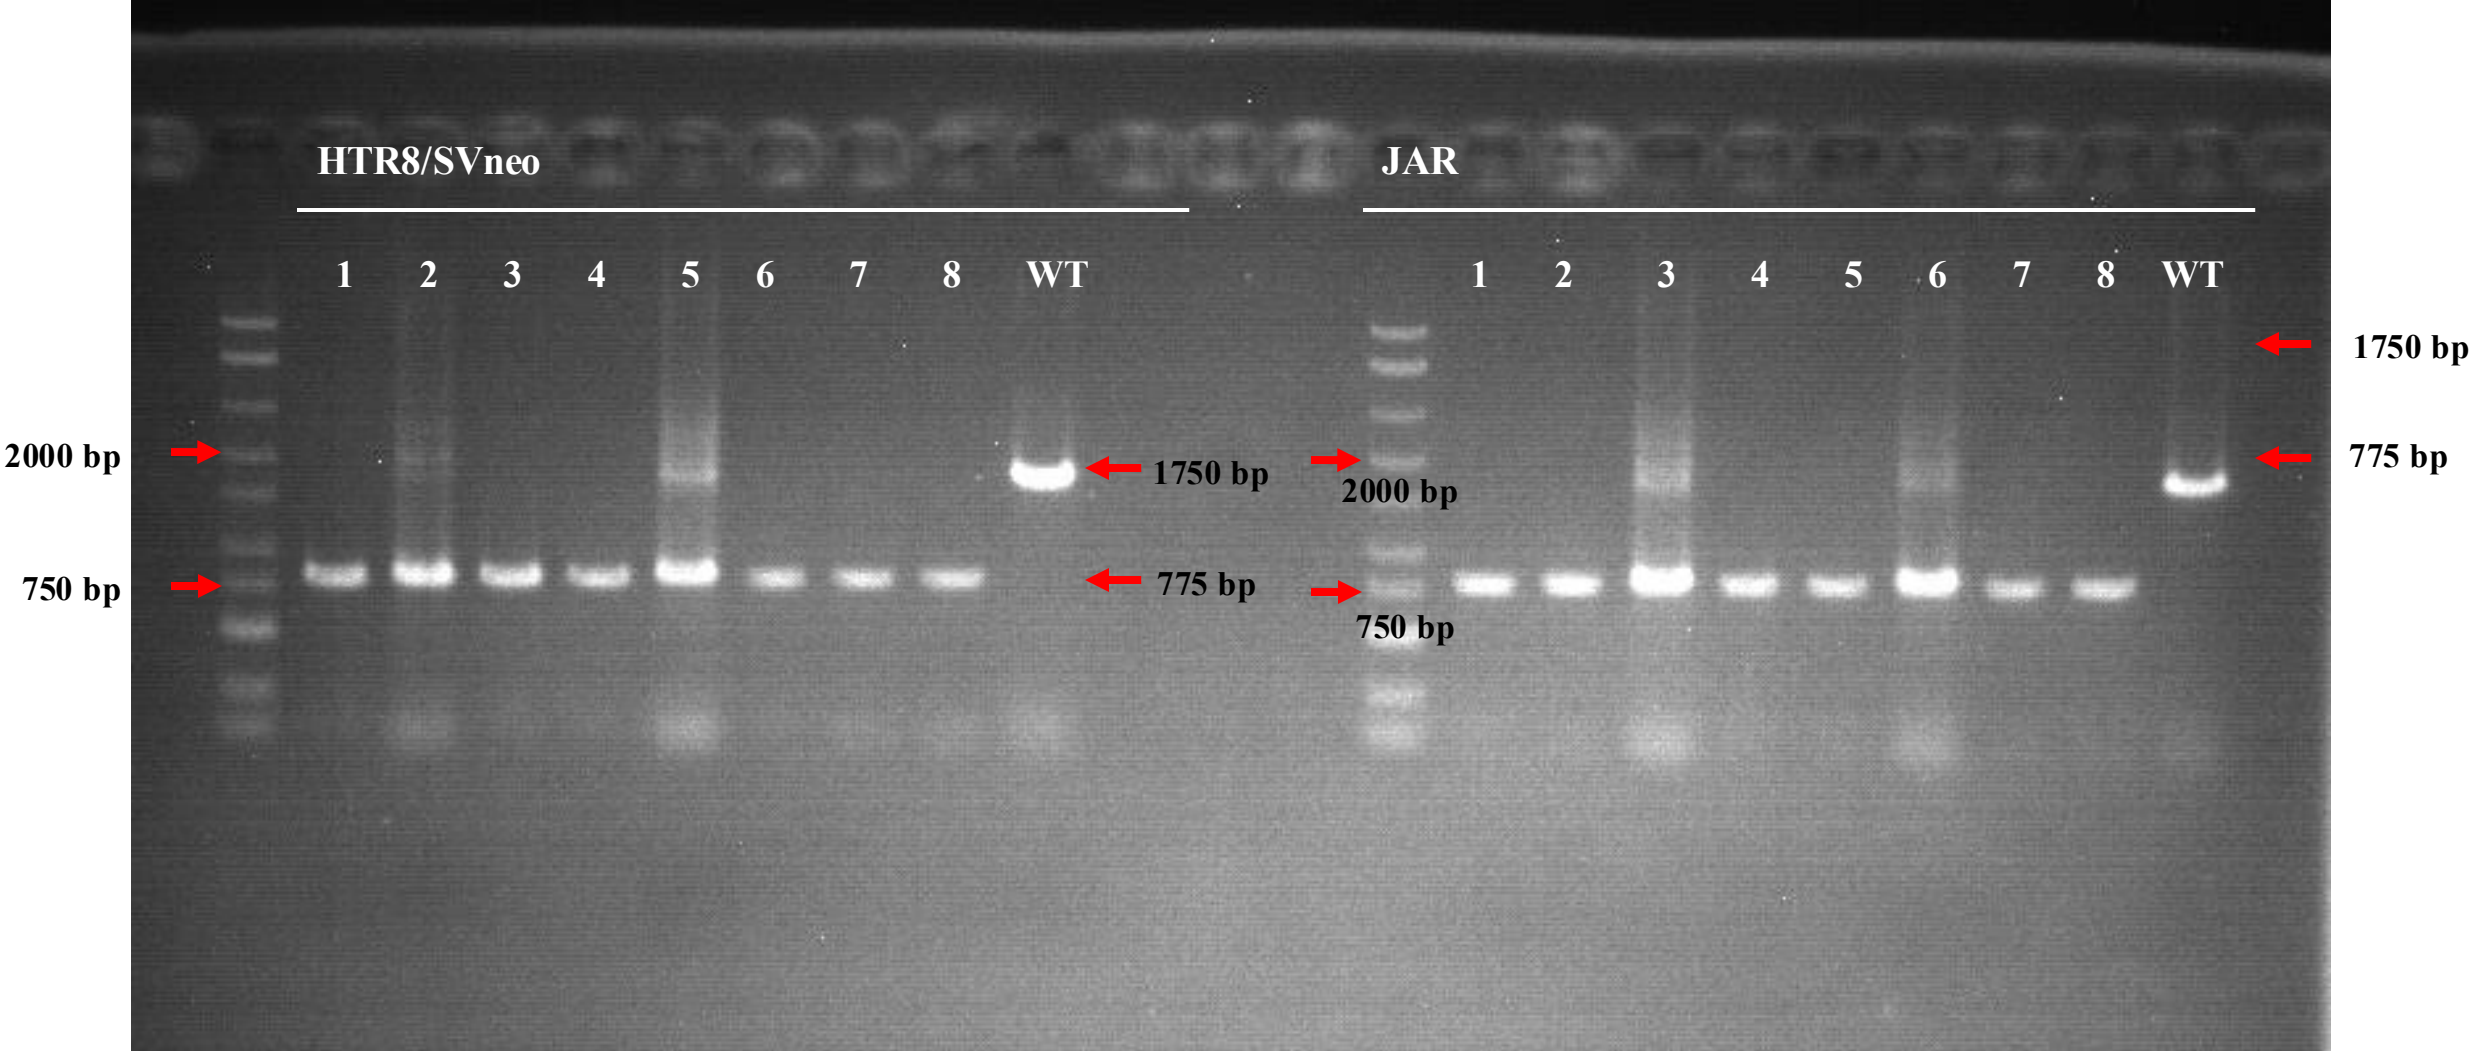

Supplement: fig2-figsupp1-data1 [file elife-101236-fig2-figsupp1-data1-v1.zip]

Figure 2 - Figure supplement 3 source data 1 D

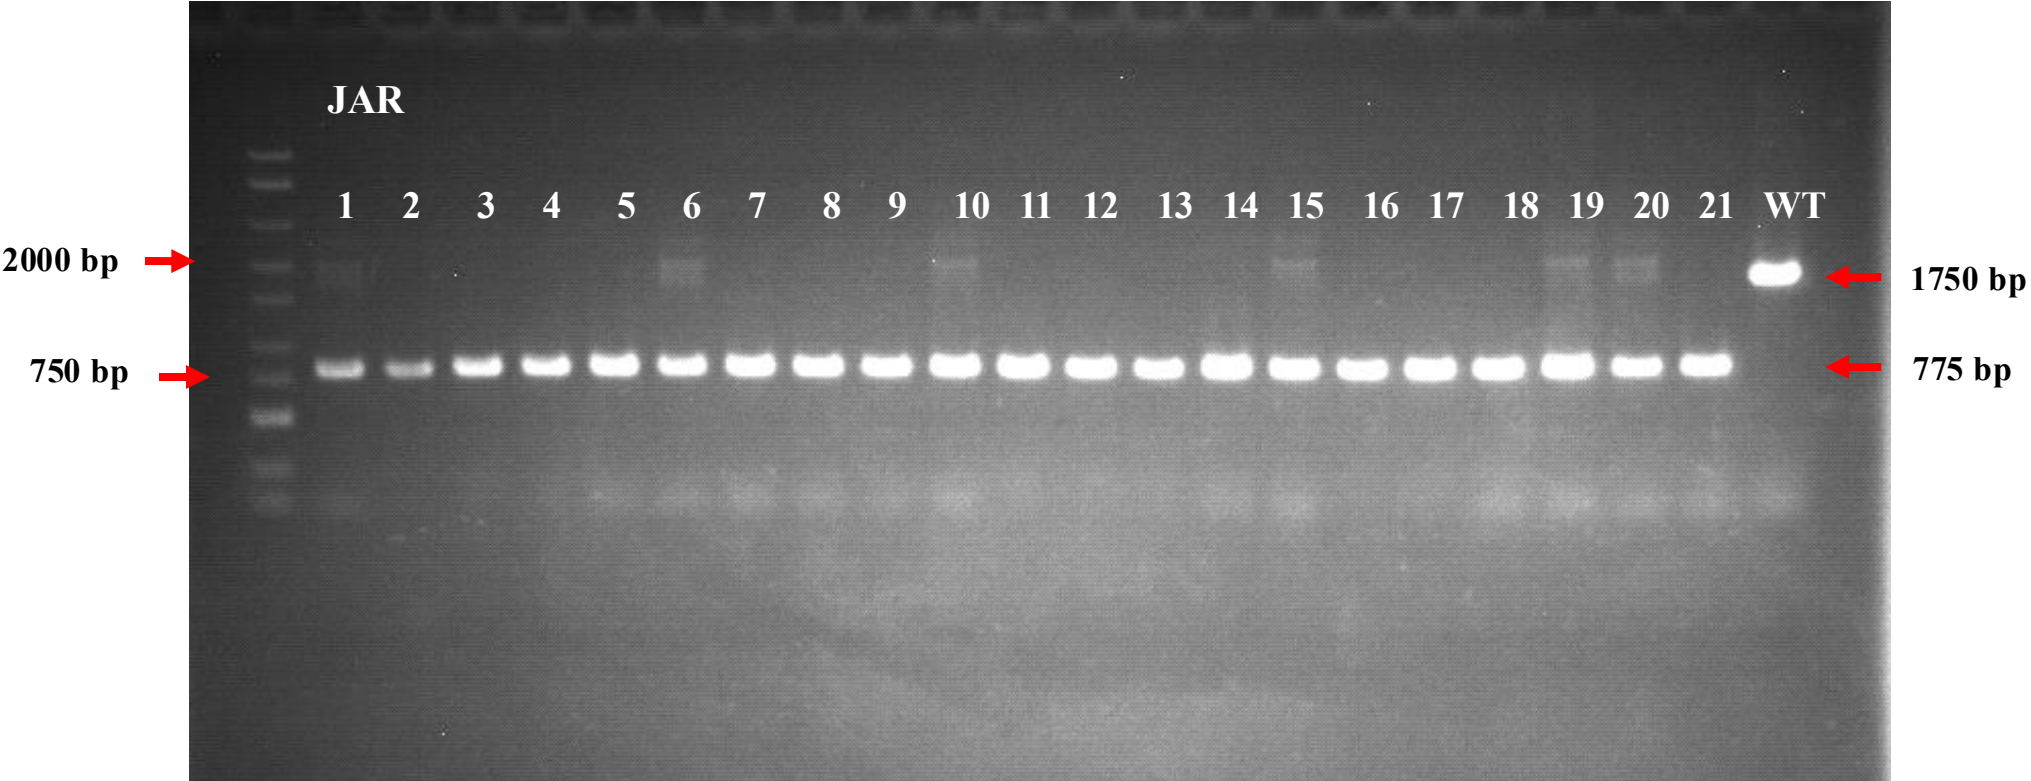

Supplement: fig2-figsupp1-data1 [file elife-101236-fig2-figsupp1-data1-v1.zip]

**Figure 7A**

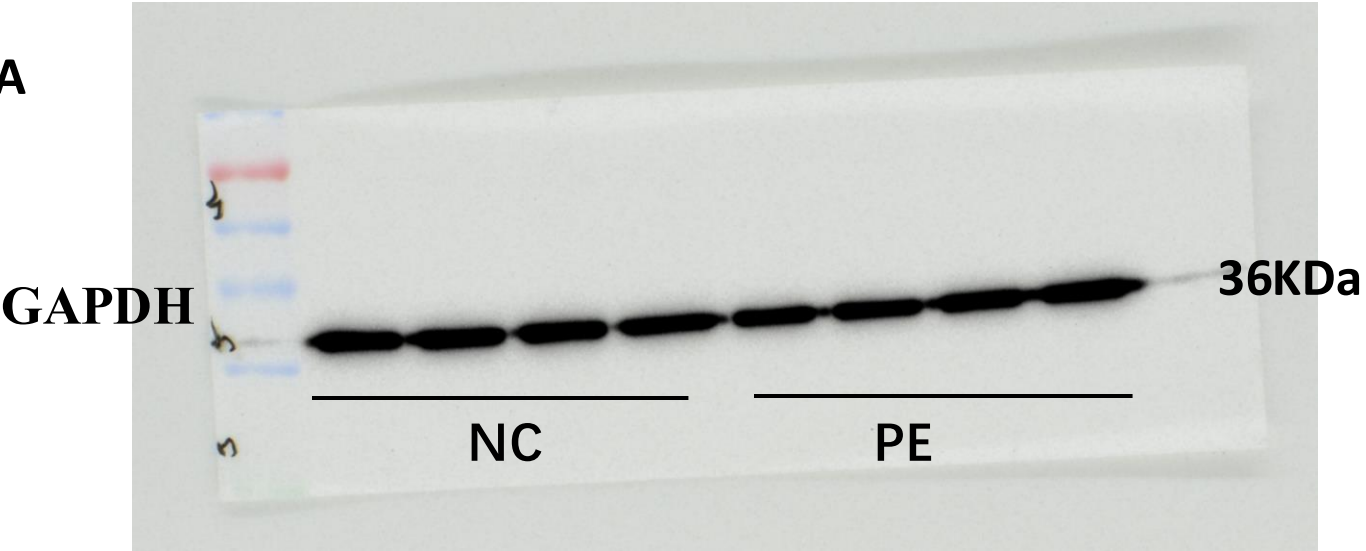

Supplement: fig7-data1 [file elife-101236-fig7-data1-v1.zip]

**Figure 7A**

**GAPDH**

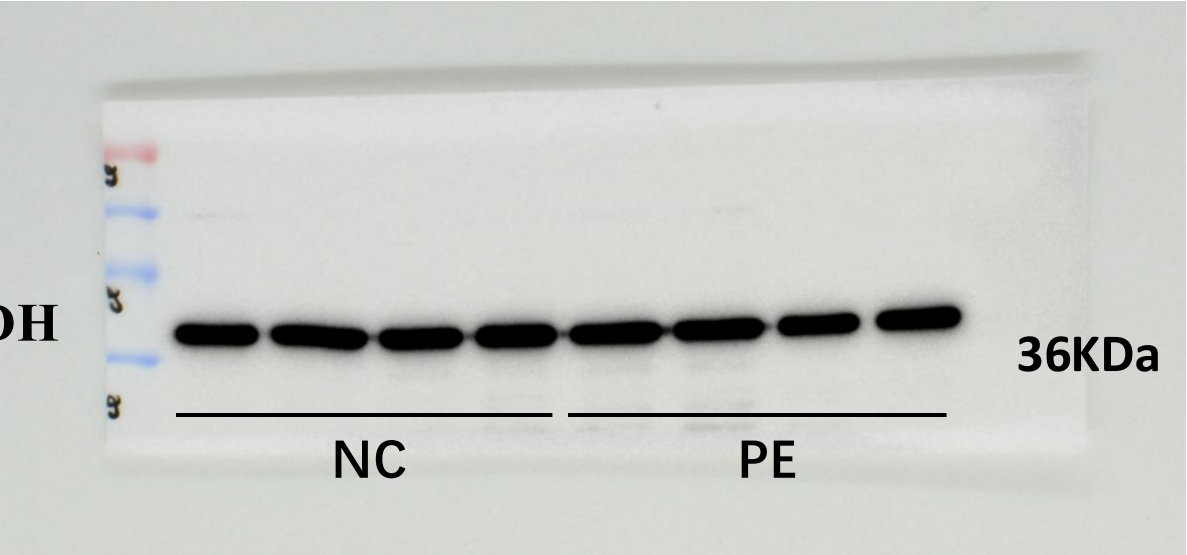

Supplement: fig7-data1 [file elife-101236-fig7-data1-v1.zip]

Figure 7A

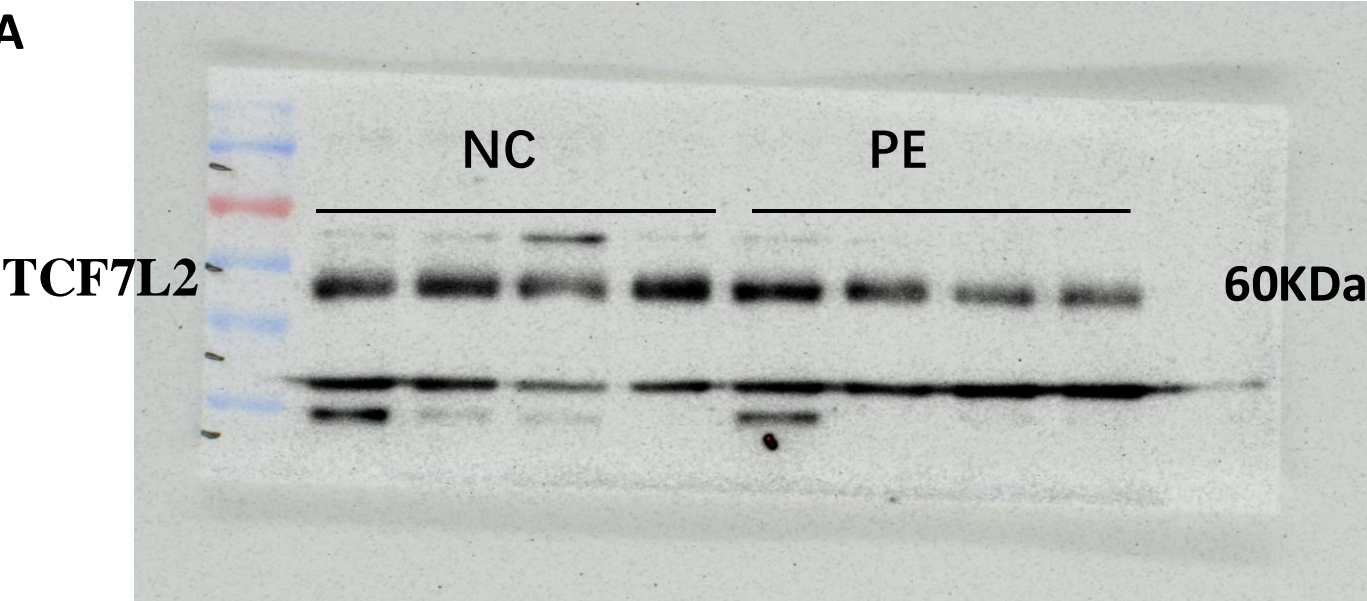

Supplement: fig7-data1 [file elife-101236-fig7-data1-v1.zip]

**Figure 7A**

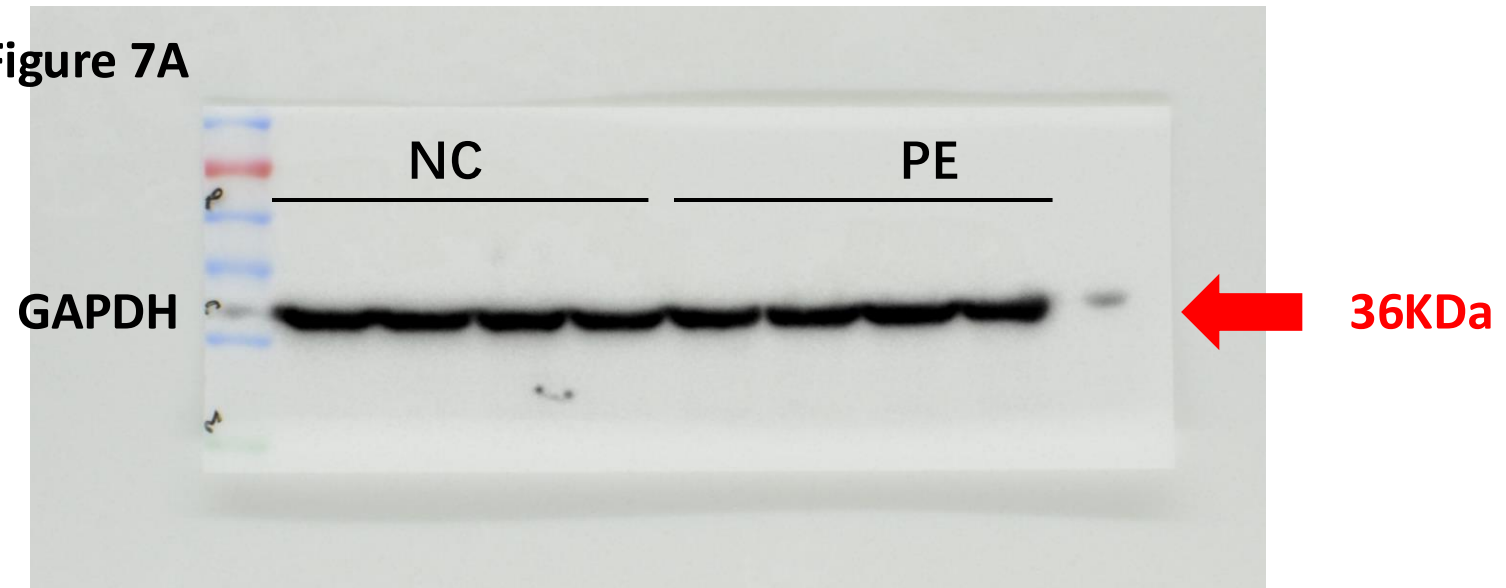

Supplement: fig7-data1 [file elife-101236-fig7-data1-v1.zip]

**Figure 7A**

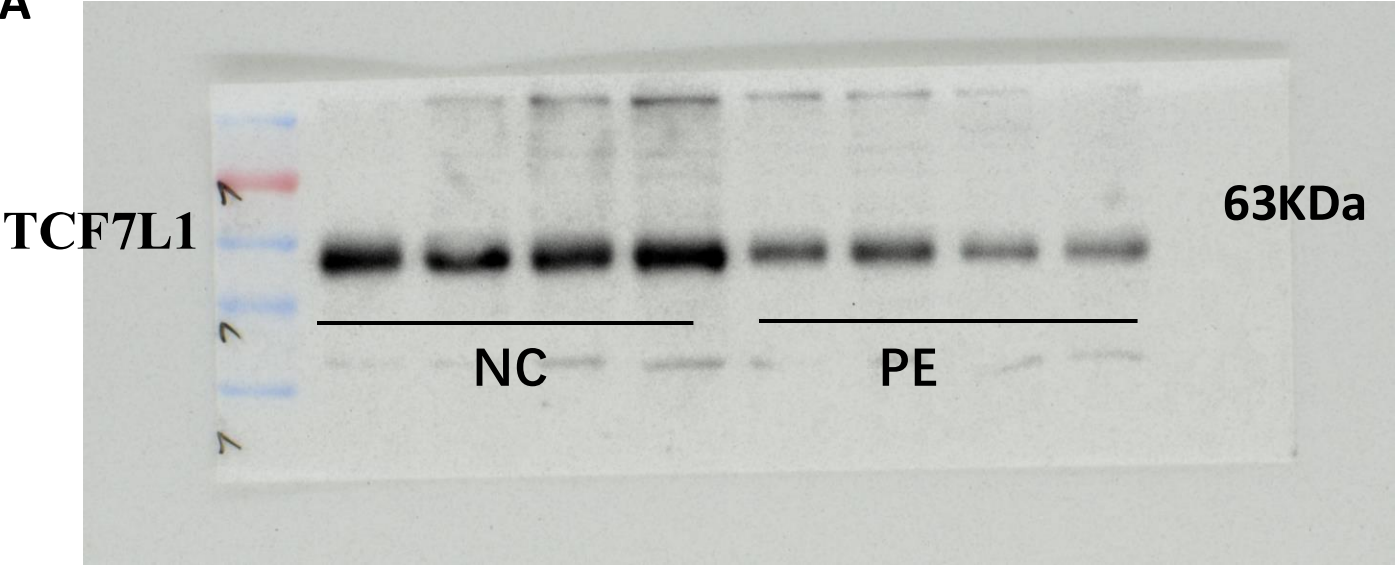

Supplement: fig7-data1 [file elife-101236-fig7-data1-v1.zip]

Figure 7A

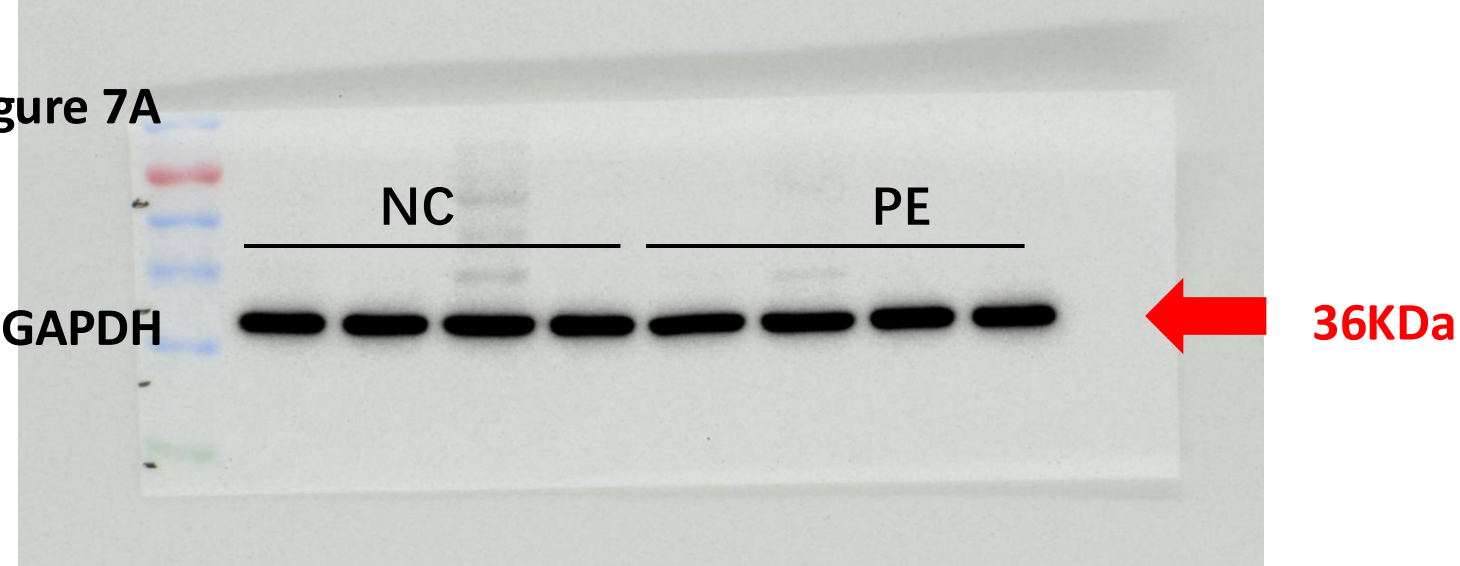

Supplement: fig7-data1 [file elife-101236-fig7-data1-v1.zip]

**Figure 7A**

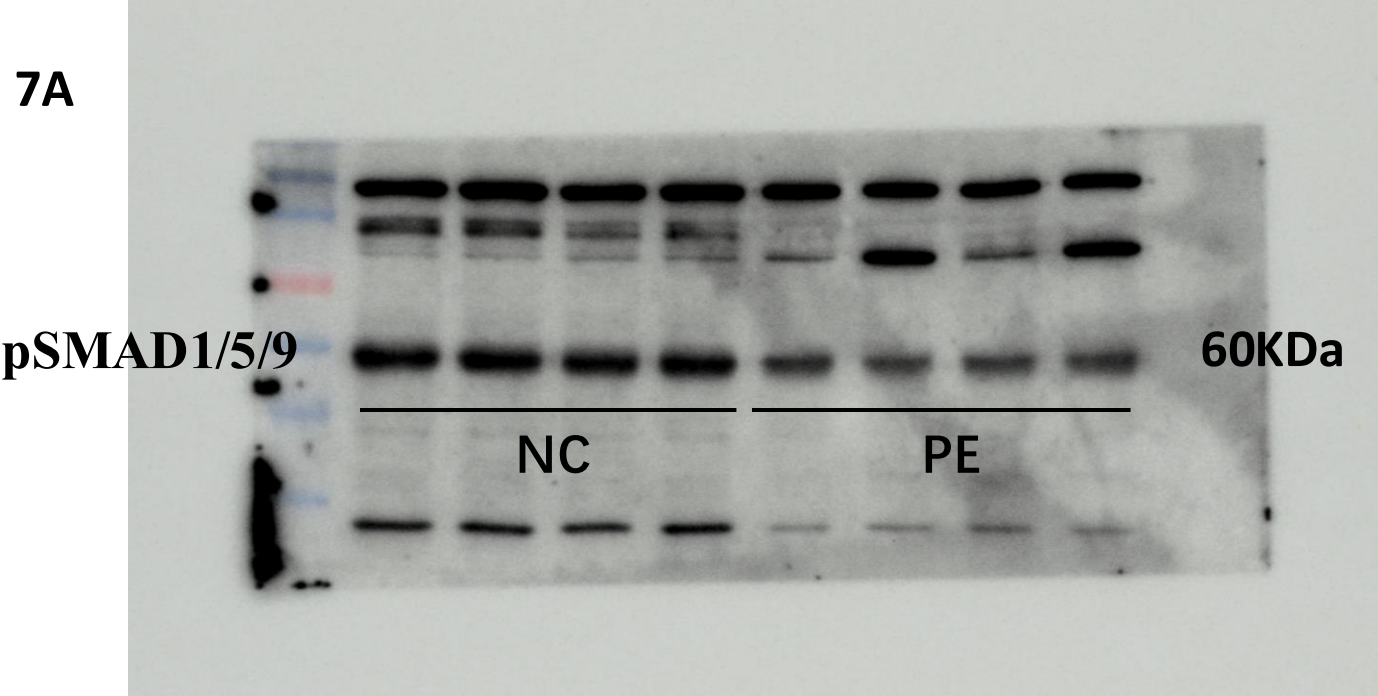

Supplement: fig7-data1 [file elife-101236-fig7-data1-v1.zip]

Figure 7A

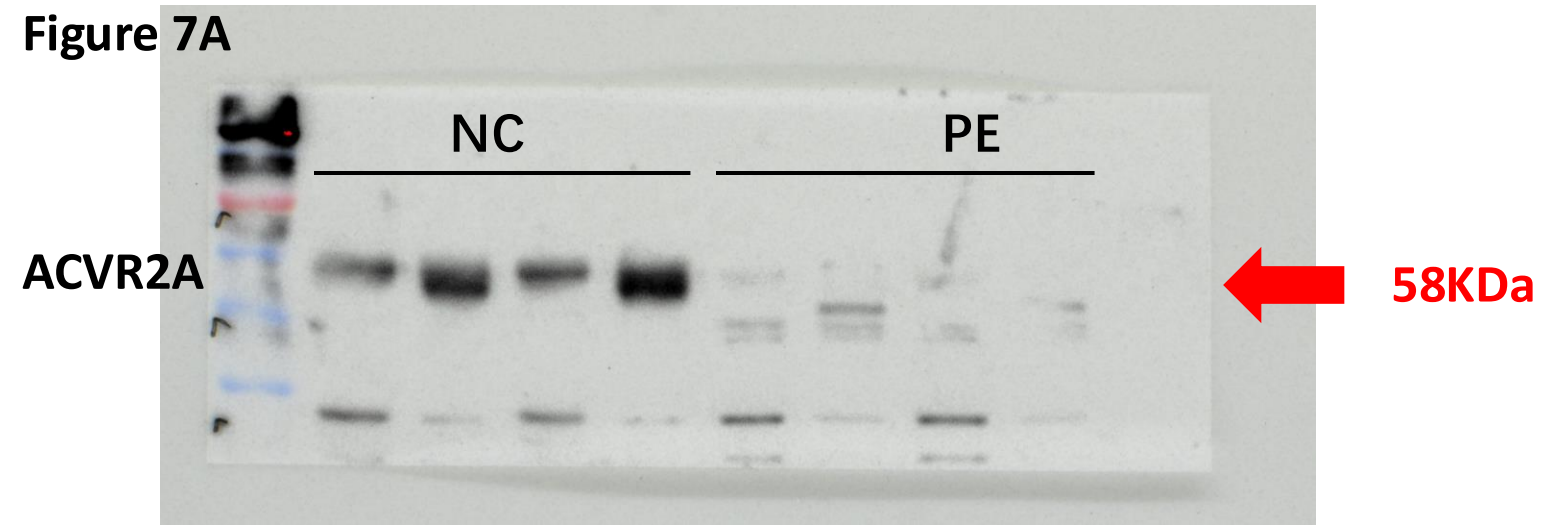

Supplement: fig7-data1 [file elife-101236-fig7-data1-v1.zip]

Figure 7A

SMAD1/5

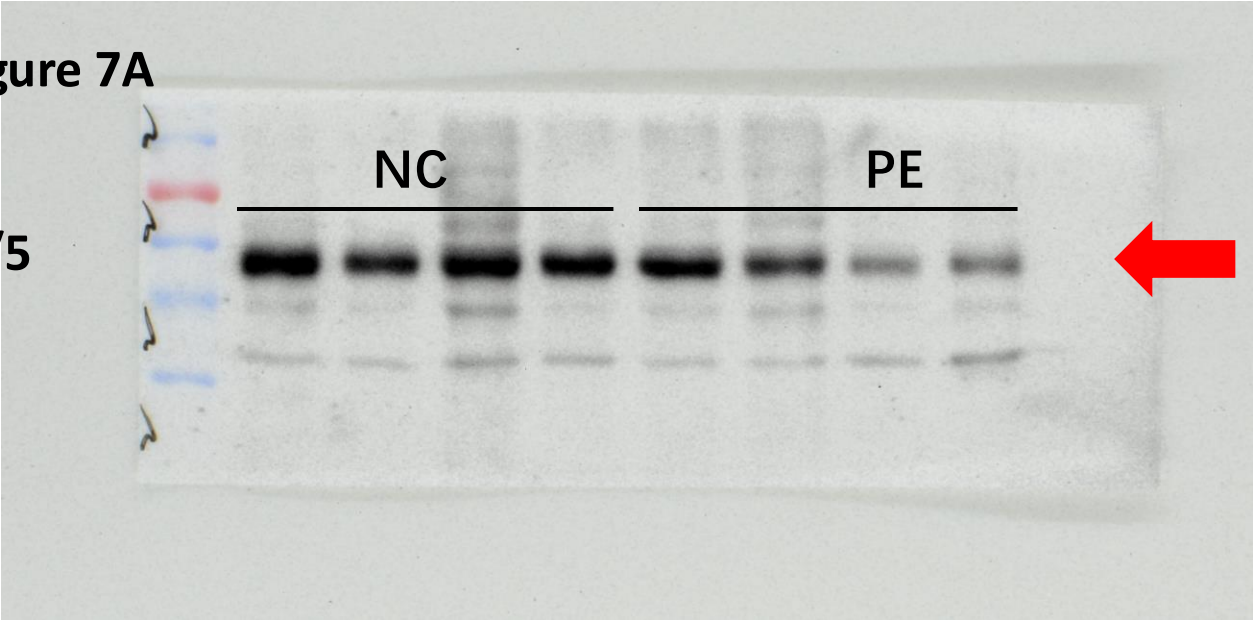

51KDa

Supplement: fig7-data1 [file elife-101236-fig7-data1-v1.zip]

Figure 7A

SMAD4

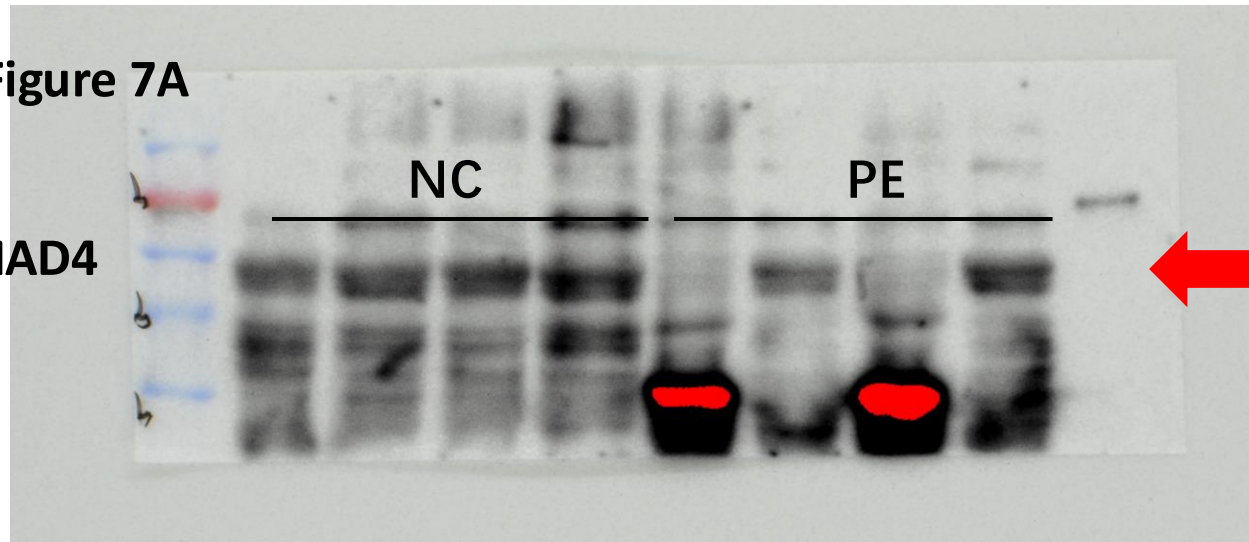

60KDa

Supplement: fig7-data1 [file elife-101236-fig7-data1-v1.zip]

**Figure 7A**

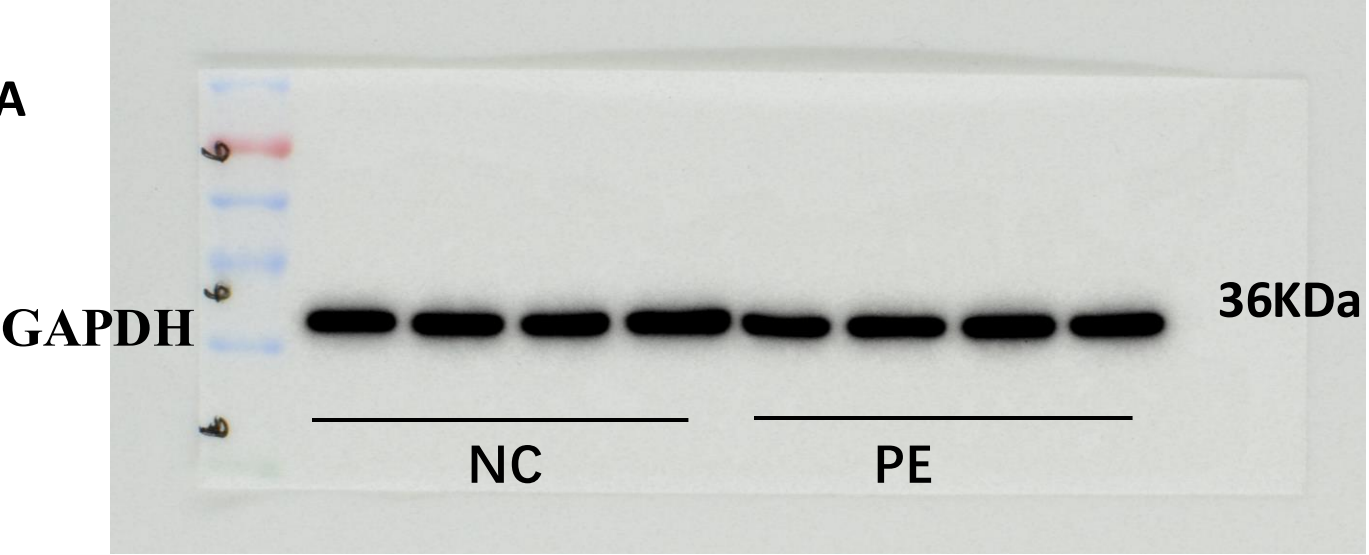

Supplement: fig7-data1 [file elife-101236-fig7-data1-v1.zip]

Figure 7A

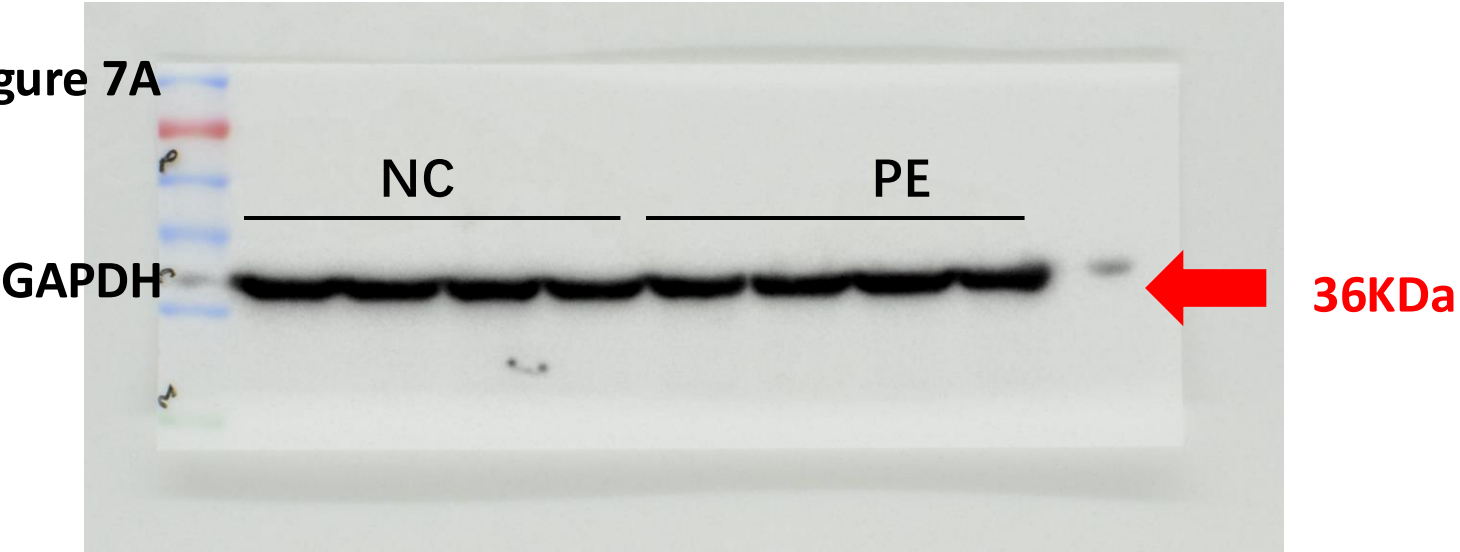

Supplement: fig7-data1 [file elife-101236-fig7-data1-v1.zip]
